# Supplementary material for: Glycyrrhizin Attenuates Portal Hypertension and Collateral Shunting via Inhibition of Extrahepatic Angiogenesis in Cirrhotic Rats
Source: MDPI journal article supplement (doi:10.3390/ijms22147662), 2021-07-17

## Supplementary Figures

### Supplementary figure S1

#### Mesentery

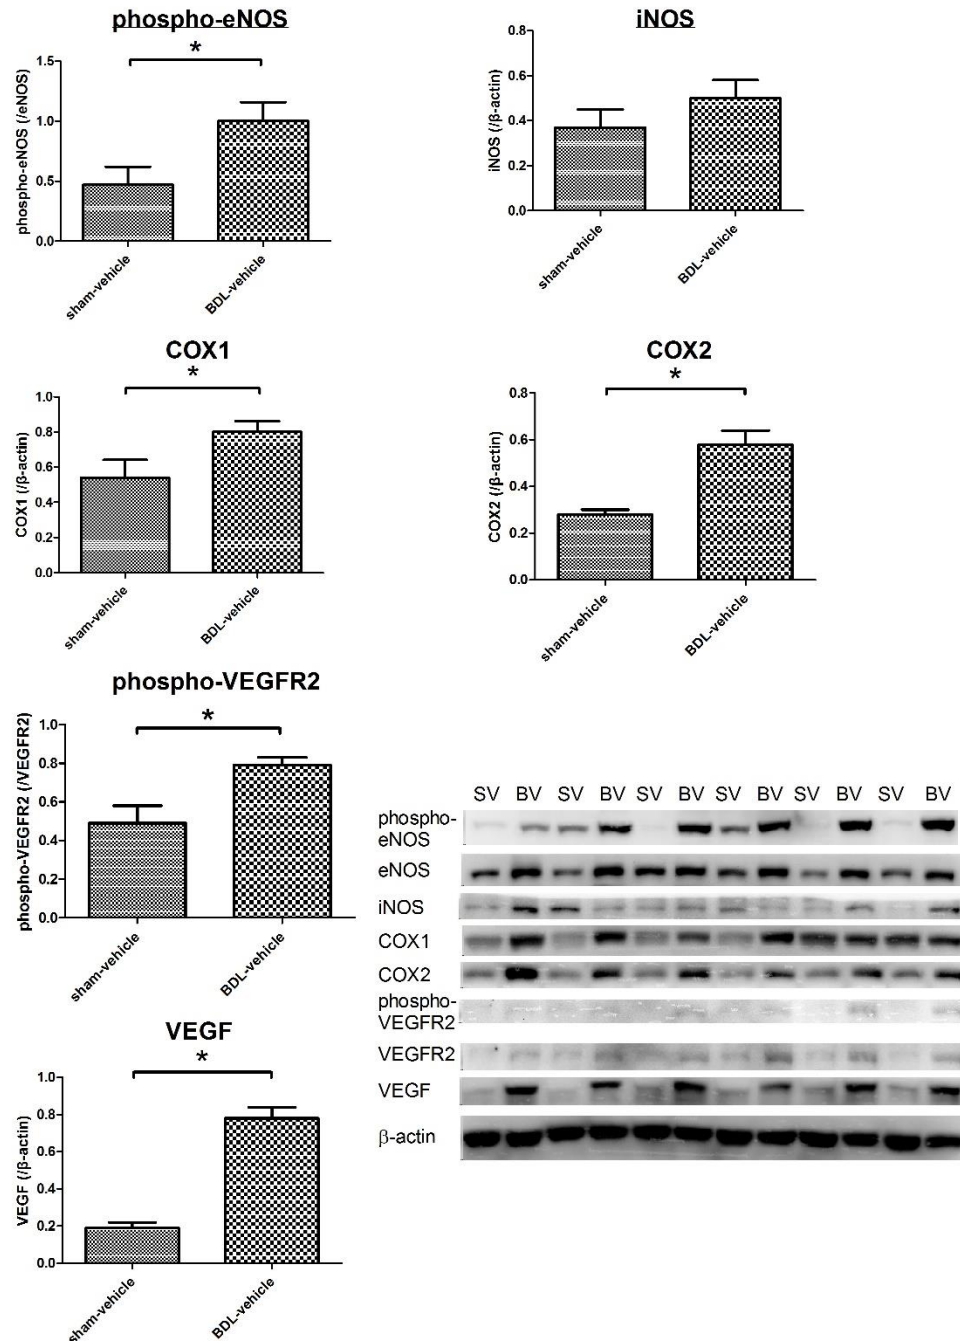

Supplementary figure S1. The angiogenic protein expressions in the mesentery. The protein expressions of phospho-eNOS, COX1, COX2, phospho-VEGFR2 and VEGF were significantly different between sham-vehicle (SV) and BDL-vehicle (BV) groups (n=6, 6). \* P<0.05

**Supplementary figure S2.** Full uncropped Western blots of Mesentery (BDL-vehicle and BDL-glycyrrhizin groups)

Mesentery phospho-eNOS  
Primary antibody: Genetex, GTX129058

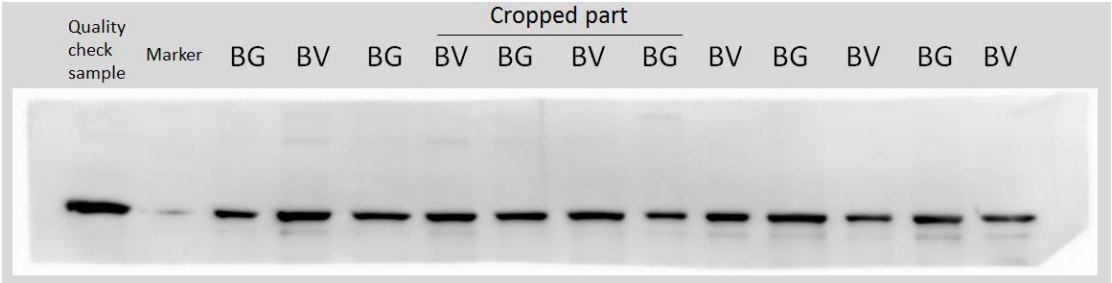

Mesentery eNOS  
Primary antibody: Cell Signaling, #32027S

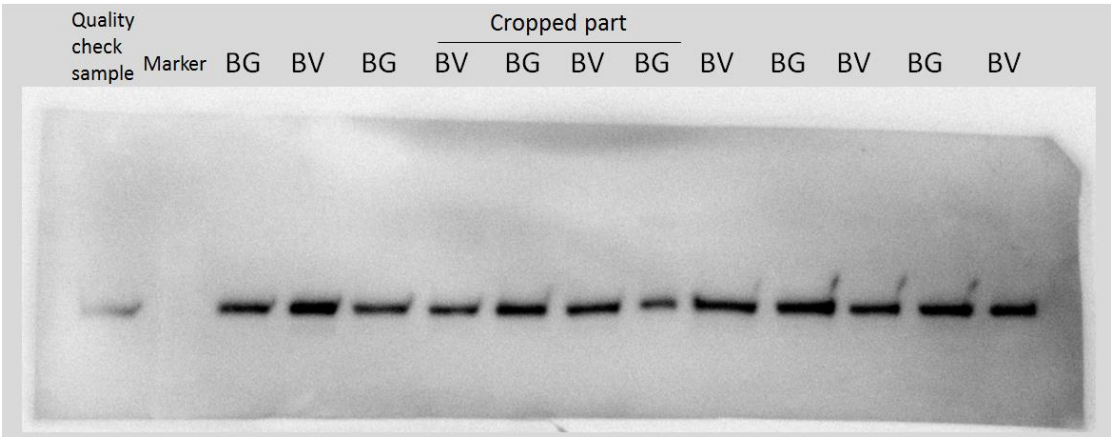

Mesentery iNOS  
Primary antibody: Genetex, GTX130246

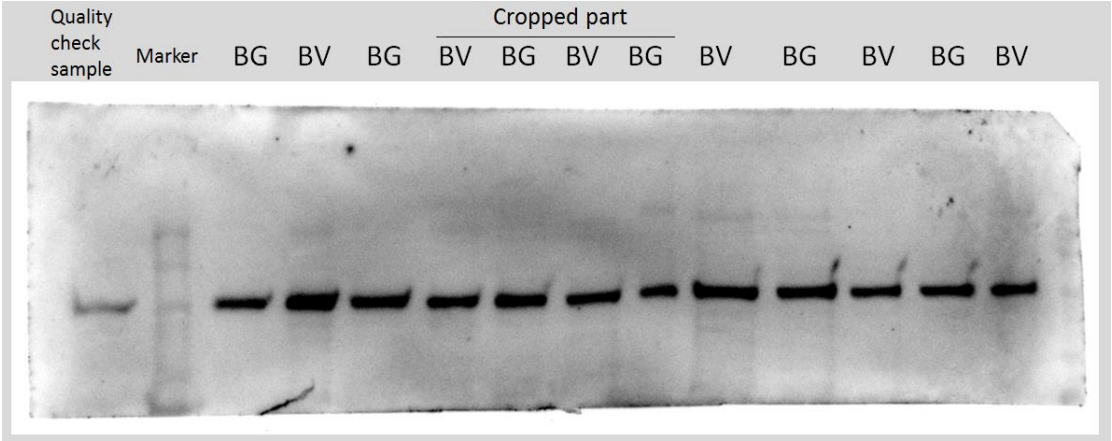

Mesentery COX1

Primary antibody: Cell Signaling, #4841S

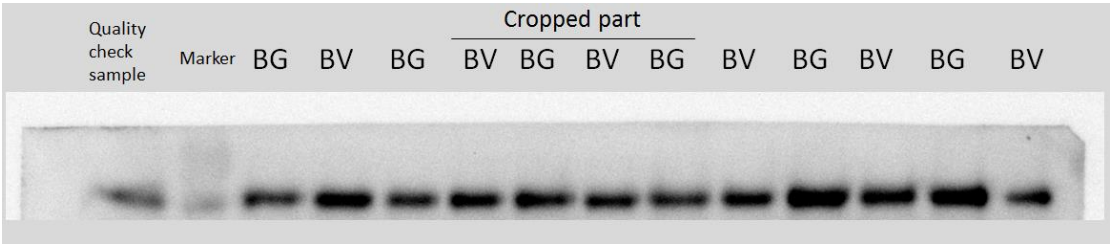

Mesentery COX2

Primary antibody: Cell Signaling, #12282S

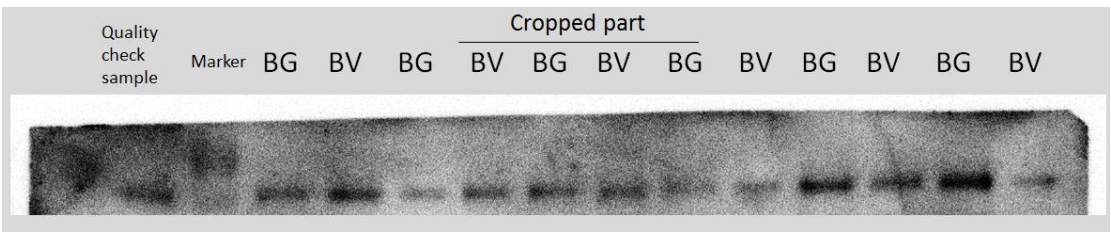

Mesentery Phospho-VEGFR2

Primary antibody: Genetex, GTX50153

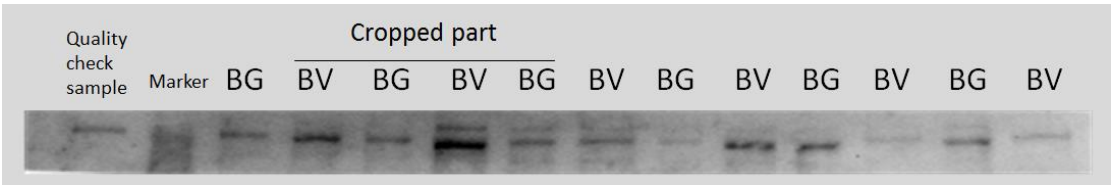

Mesentery VEGFR2

Primary antibody: Cell Signaling, #9698

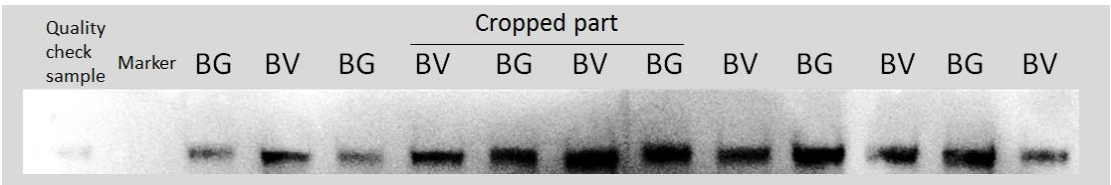

Mesentery  $\beta$ -actin

Primary antibody: Genetex, GTX629630

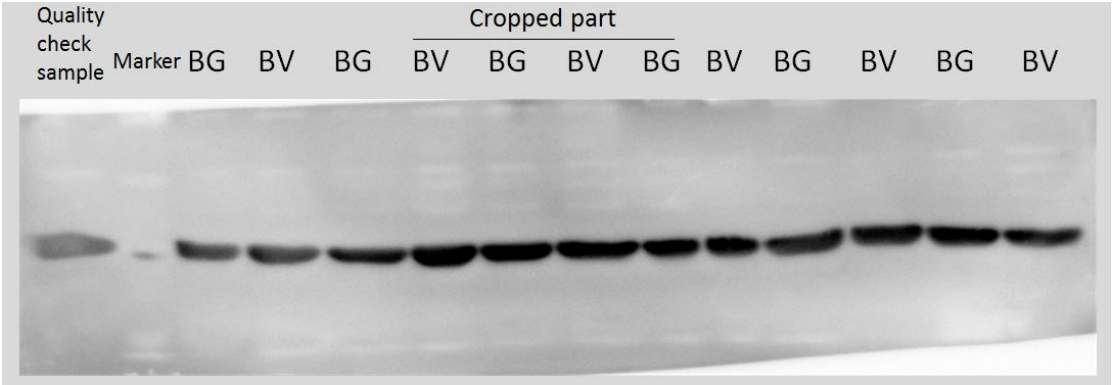

Mesentery VEGF

Primary antibody: Merch Millipore, ABS82

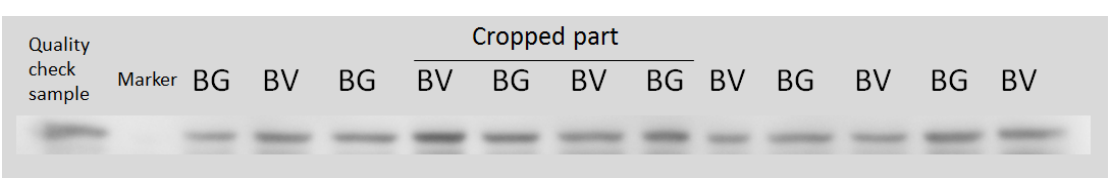

### Supplementary figure S3

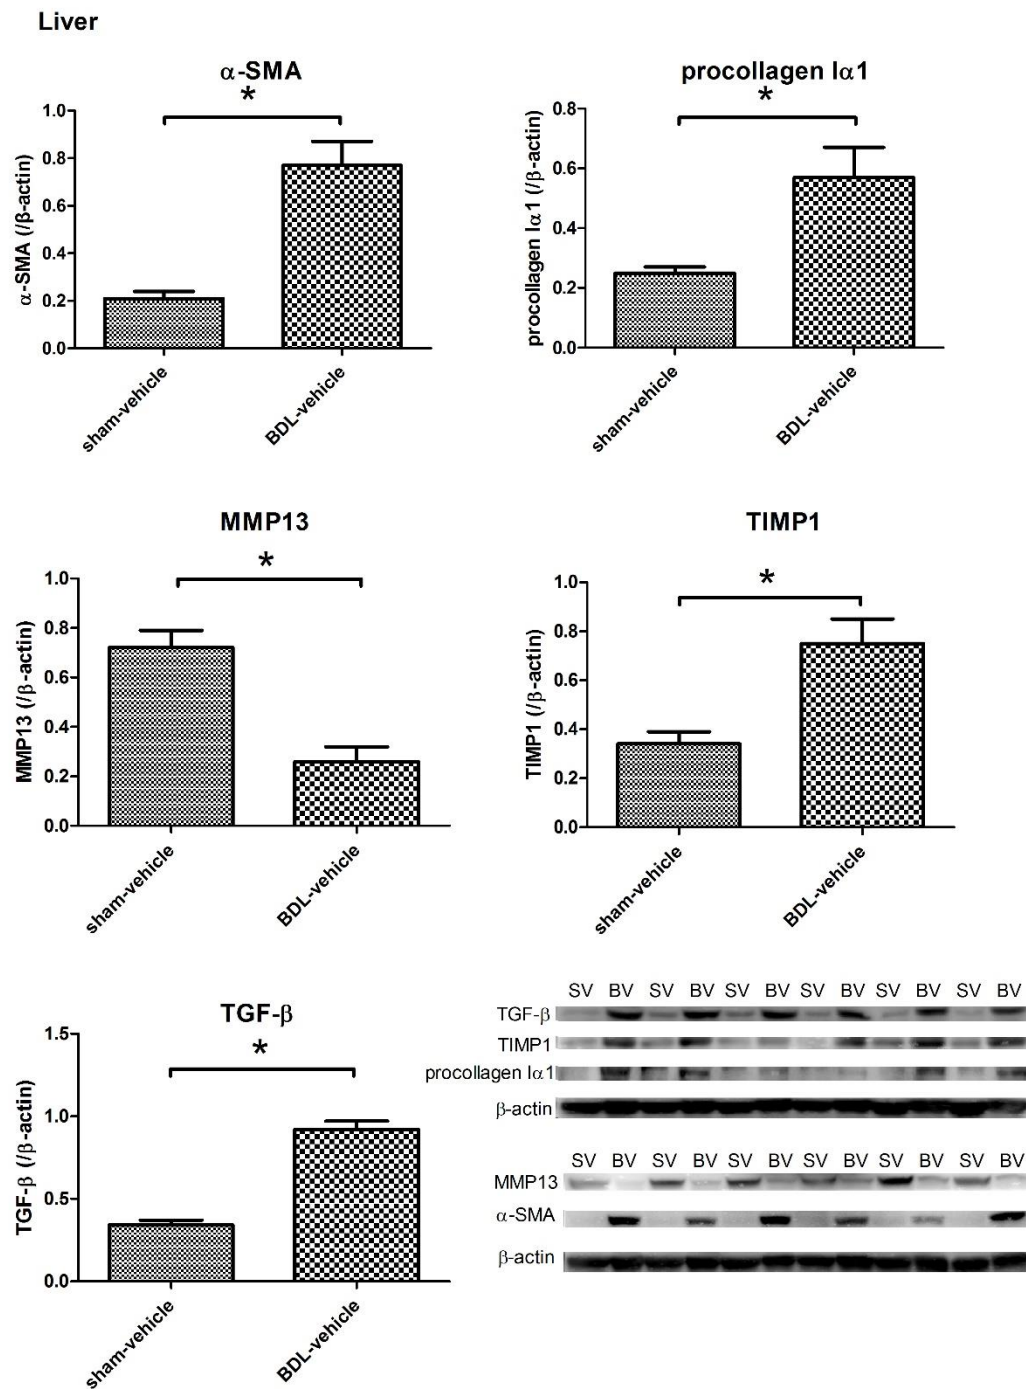

Supplementary figure S3. The fibrogenic protein expressions in the liver. The protein expressions of  $\alpha$ -SMA, procollagen I $\alpha$ 1, MMP13, TIMP1 and TGF- $\beta$  were significantly different between Sham-vehicle (SV) and BDL-vehicle (BV) groups (n=6, 6). \*  $P < 0.05$

**Supplementary figures S4.** Full uncropped Western blots of liver (BDL-vehicle and BDL-glycyrrhizin groups)

Liver  $\alpha$ -SMA

Primary antibody: Genetex, GTX100034

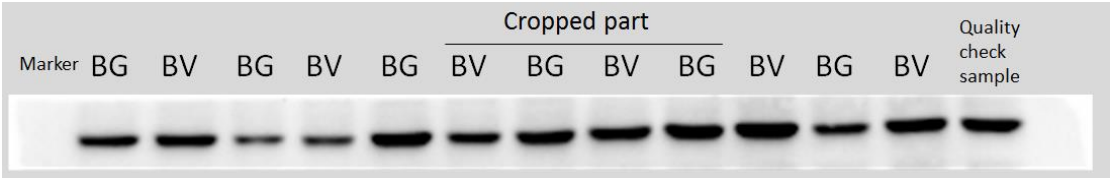

Liver procollagen I $\alpha$ 1

Primary antibody: Abcam, ab34710

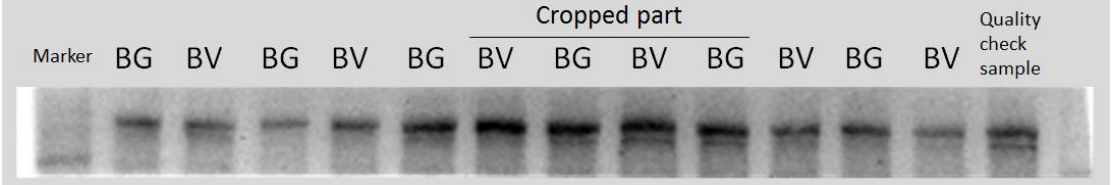

Liver MMP13

Primary antibody: Genetex, GTX100665

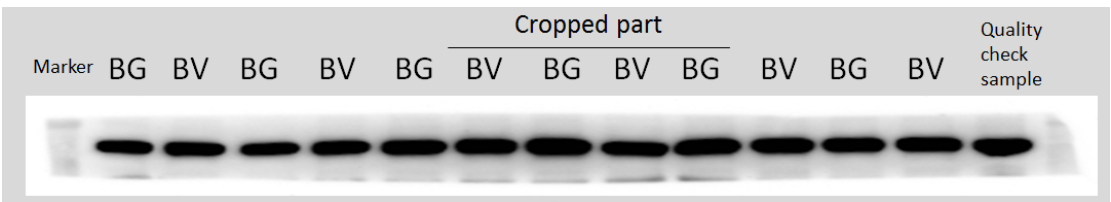

Liver TIMP1

Primary antibody: Genetex, GTX64360

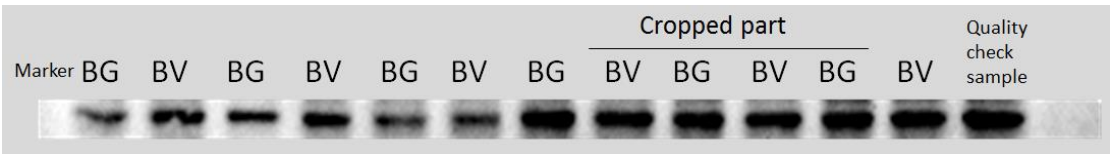

Liver TGF- $\beta$

Primary antibody: Genetex, GTX45121

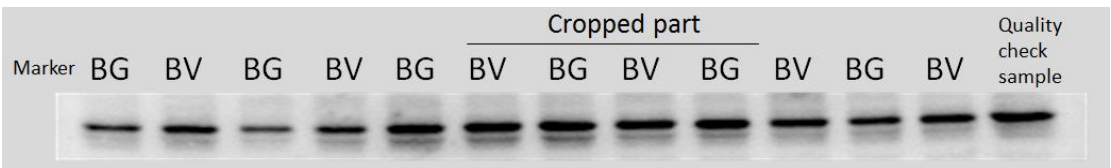

Liver  $\beta$ -actin

Primary antibody: Genetex, GTX629630

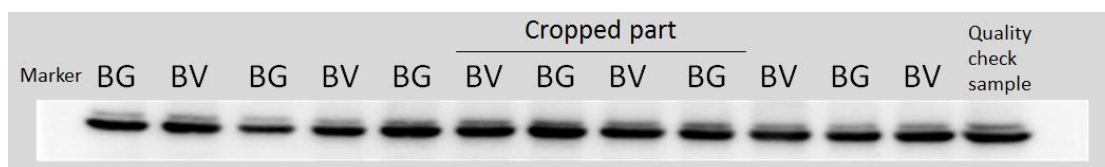

Supplement: s1 [file s1]
